# 1 Imagery of movements immediately following performance 2 allows learning of motor skills that interfere

3 Hannah R. Sheahan\*, James N. Ingram, Goda M. Žalalytė, Daniel M. Wolpert

4 Computational and Biological Learning Laboratory, Department of Engineering, University of Cambridge

5 \*Corresponding author: sheahan.hannah@gmail.com

---

## 6 Abstract

8 Motor imagery, that is the mental rehearsal of a motor skill, can lead to improvements when performing the same skill.  
9 Here we show a powerful and complementary role, in which motor imagery of movements after actually performing a skill  
10 allows learning that is not possible without imagery. We leverage a well-studied motor learning task in which subjects reach  
11 in the presence of a dynamic (force-field) perturbation. When two opposing perturbations are presented alternately for the  
12 same physical movement, there is substantial interference, preventing any learning. However, when the same physical  
13 movement is associated with follow-through movements that differ for each perturbation, both skills can be learned. Here  
14 we show that when subjects perform the skill and only imagine the follow-through, substantial learning occurs. In contrast,  
15 without such motor imagery there was no learning. Therefore, motor imagery can have a profound effect on skill acquisition  
16 even when the imagery is not of the skill itself. Our results suggest that motor imagery may evoke different neural states for  
17 the same physical state, thereby enhancing learning.

---

## 20 Introduction

21 The ability to acquire new motor skills without disrupting existing ones is critical to the development of a broad motor  
22 repertoire. We have previously suggested that the key to representing multiple motor memories is to have each associated  
23 with different neural states, rather than physical states of the body (Sheahan et al., 2016). Specifically, we proposed  
24 that when reaching in two opposing force-field environments which alternate randomly from trial to trial, the inability  
25 of subjects to learn (Brashers-Krug et al., 1996; Gandolfo et al., 1996; Howard et al., 2012, 2013, 2015) is due to the fact  
26 that each movement is associated with the same neural states. However, contexts which separate neural states for the  
27 same physical states should allow learning by enabling the same physical movement to be associated with different motor  
28 commands. For example, if each movement through the force-field is part of a larger motor sequence comprised of a  
29 different follow-through movement, two opposing perturbations can be learned (Howard et al., 2015; Sheahan et al., 2016).  
30 As motor preparation is thought to involve setting the initial neural state (Churchland et al., 2012), just planning different  
31 follow-through movements, without execution, results in learning of distinct representations (Sheahan et al., 2016). From  
32 this perspective, other behaviours that create different neural states for the same physical states may also enable the  
33 learning of distinct motor memories.

34 Many studies have suggested that imagining a movement and physically executing it may engage similar neural substrates.  
35 For example, human neuroimaging research has shown similar motor-related activity when imagining and executing  
36 movements (Dechent et al., 2004; Mokienko et al., 2013; Héту et al., 2013; Hardwick et al., 2017). However, such studies  
37 cannot conclusively establish it is the same circuits involved in both imagining and executing. In contrast, direct recording of  
38 neural populations have recently revealed that when monkeys covertly control a BMI-cursor, the evolution of neural states  
39 associated with the preparation and execution of the BMI movements are similar and specific to those observed during  
40 the corresponding physical reaches (Vyas et al., 2018). Given that similar motor cortical dynamics are seen in human and  
41 non-human primates (Pandarinath et al., 2015), we hypothesized that the same overlap of dynamical neural states may also

42 exist when humans prepare and execute imagined movements.

43 We hypothesized that imagining movements results in distinct neural states that can drive the formation and retrieval of  
44 different motor memories. In contrast to studies of mental rehearsal in which the motor skill is imagined but not performed,  
45 here we ask whether performing the skill as part of a larger, imagined motor sequence affects its representation. Specifically,  
46 we ask whether two opposing perturbations which would normally interfere, can be learned if each is associated with  
47 an imagined follow-through movement. We show that when participants produce the same physical reach, but imagine  
48 performing follow-throughs that differ for each field, substantial learning occurs. Moreover, we find that learning under  
49 imagery transfers partially to actual movements, suggesting that motor imagery and execution engage overlapping neural  
50 states. In contrast, without motor imagery there was no learning. Our results suggest that motor imagery can have a  
51 profound effect on skill acquisition and the representation of motor memories, even when the imagery is not of the skill  
52 itself.

## 53 Results

54 Five groups of participants performed a motor learning task. Participants grasped the handle of a robotic interface and  
55 made reaching movements from one of four starting locations through a perturbing force field to a central target (see  
56 Methods). On exposure trials, the field direction (clockwise or counter-clockwise) was randomly selected on each trial. We  
57 associated the direction of the force field with the location of a secondary target which was at  $\pm 45^\circ$  relative to the movement  
58 to the central target. The groups differed in whether they were required to continue the reach from the central target to the  
59 secondary target and what instructions they were given (Figure 1A).

60 During the exposure phase, we interspersed exposure trials with channel trials, in which the movement was confined to a  
61 simulated mechanical channel from the start to central target. For all groups, on these channel trials subjects made a follow  
62 through movement to the secondary target which was unconstrained (Figure 1B, left). Note that the simulated channel did  
63 not expose subjects to the force field and therefore learning was not possible on these trials. The channel trials allowed us  
64 to measure predictive force compensation (the force applied by the participant into the channel wall, expressed as percent  
65 adaptation) on the initial movement, independent from factors such as co-contraction (Scheidt et al., 2000; Milner and  
66 Franklin, 2005). On non-channel trials, we also calculated the maximum perpendicular error (MPE) of the hand path to the  
67 central target, which is a measure of the kinematic error of the movement.

68 On exposure trials, the first group of participants were required to make a second unperturbed follow through movement  
69 to the secondary target immediately after arriving at the central target (Figure 1A, Follow through). Importantly, this follow  
70 through movement was predictive of the field direction. The second group planned the follow through, but never executed  
71 it on exposure trials (Figure 1A, Planning only). That is, the secondary target was displayed from the start of the trial but  
72 vanished during the initial movement indicating that the subject should terminate the movement at the central target. To  
73 encourage the planning of the entire movement, this group (like all other groups) also made full follow through movements  
74 on channel trials (Figure 1B, left).

75 Both these groups showed significant learning of the two force fields (adaptation increases of  $42.9 \pm 7.5\%$ ,  $t(7) = 5.92$ ,  $p =$   
76  $5.9e-4$  and  $41.9 \pm 4.8\%$ ,  $t(7) = 9.87$ ,  $p = 2.3e-5$  for the follow through and planning groups, respectively), reaching approximately  
77 40% of full compensation (Figure 2A, blue and grey). Moreover, both these groups showed significant aftereffects when the  
78 force field was removed during the post-exposure phase (difference in MPE between pre- and post-exposure;  $0.94 \pm 0.14$   
79 cm,  $t(7) = 7.28$ ,  $p = 1.7e-4$ , and  $0.78 \pm 0.17$  cm,  $t(7) = 5.05$ ,  $p = 0.0015$  for each group respectively). These first two groups  
80 included data from six subjects from a previously published study (Sheahan et al., 2016), together with two additional  
81 subjects in each group, to provide a baseline for the new groups.

82 To assess whether motor imagery, like planning, is sufficient to separate motor memories, we compared a no-imagery and  
83 an imagery group (Figure 1A). As in the follow through and planning only groups, on channel trials the central target was  
84 grey, and participants produced a full follow-through movement. In contrast to the follow through and planning only groups,  
85 on exposure trials the central target was blue, such that subjects knew from the start of the trial that they were required to  
86 stop at the central target without making a follow through movement. Both groups maintained fixation on the central target

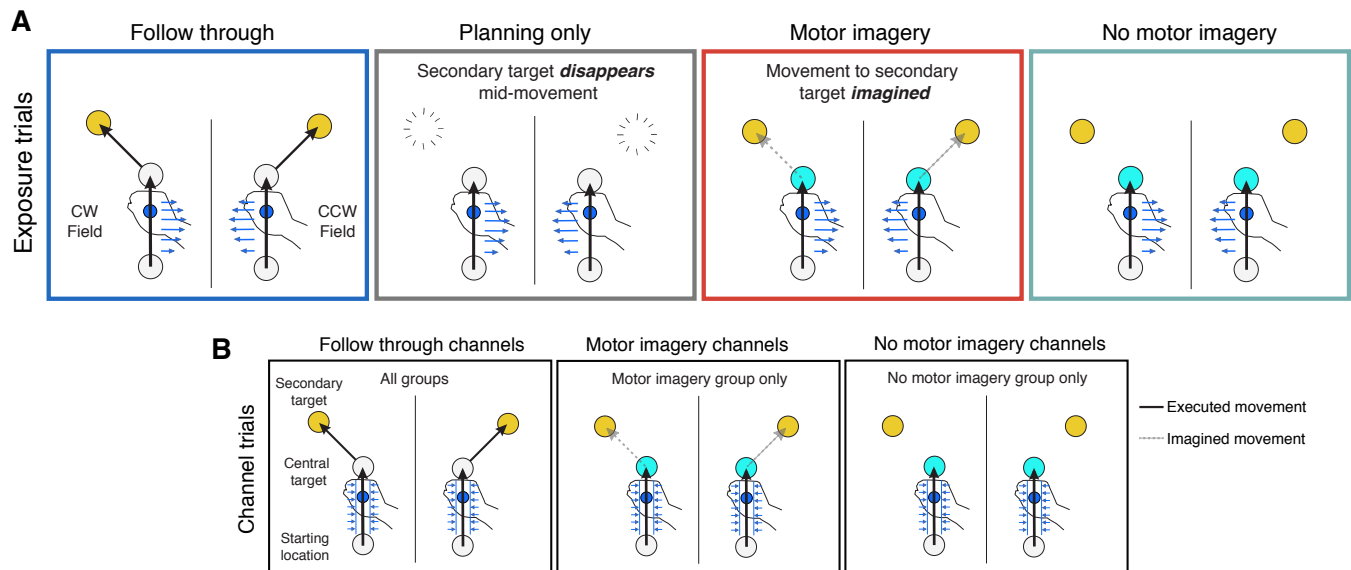

**Figure 1. Experimental paradigm** Subjects performed reaching movements that were either (A) exposure trials or (B) channel trials. On all trials a starting location, central target and one secondary target (at either  $-45^\circ$  or  $+45^\circ$  relative to the initial movement direction) were displayed from the start of the trial. (A) On exposure trials, a velocity-dependent curl force field (blue arrows) was applied on the initial movement. The field direction, clockwise (CW) or counter-clockwise (CCW) was determined by the secondary target location. The exposure trials varied across the groups. The Follow through group continued the initial movement to the secondary target (null field as in channel trials). For the Planning only group, the secondary target disappeared late in the initial movement and they were required to stop at the central target. Both the Motor imagery and No-motor imagery groups were cued by a blue central target, displayed from the start of the trial, that they should stop the movement at the central target. In addition, the motor imagery groups were asked to imagine making a movement to the secondary target and press a button when the imagined movement was complete. (B) On follow through channel trials (left), subjects made a movement to the central target followed immediately by a movement to the secondary target. A channel was applied on the initial movement, allowing an assessment of adaptation measured as the forces applied into the channel wall. A null field was applied on the secondary movement. For half of participants in the motor imagery group, we also included channels for imagined follow through trials (middle) at the end of the exposure phase. Likewise, for half of participants in the no-motor imagery group we included channels for movements just to the central target (right). Note that for clarity in all panels the trials for the two different secondary targets are shown separated, but in the experiment the starting and central targets were in identical locations so that the initial movements were the same. In the experiment there were 4 possible starting locations but for clarity we display only one.

87 throughout each trial. Critically, the motor imagery group was asked to then imagine making the follow-through movement  
88 to the secondary target, whereas the no-imagery group was given no such instructions. Therefore, for the motor imagery  
89 group, the imagined follow through movement was specific to the force field. To complete a motor imagery trial, these  
90 participants pressed a button with their left hand to indicate when the imagined movement reached the secondary target.  
91 Importantly, the button-press was the same for both secondary targets, and was therefore not specific to the force-field  
92 direction. In the no-imagery group, there was no button press, but participants waited at the central target for the average  
93 amount of time it took them to execute follow-through movements (on channel trials). Consequently, the amount of time  
94 spent waiting at the central target did not differ between the imagery and no imagery groups (difference of  $72 \pm 41$  ms,  $t(30)$   
95 = 1.72,  $p = 0.096$ ). After the exposure phase, half of the participants in each group ( $n=8$ ) performed a post-exposure phase,  
96 identical to the two previous groups, so that we could assess aftereffects. The other half of the participants proceeded to a  
97 probe phase of the experiment (see below).

98 Despite knowing prior to movement initiation that the movement would end at the central target, the motor imagery group  
99 increased their adaptation (Figure 2A, red; increase of  $21.8 \pm 3.1\%$ ,  $t(15) = 7.47$ ,  $p = 2.0e-6$ ) and also produced significant  
100 aftereffects (Figure 3C, red;  $0.68 \pm 0.20$  cm,  $t(7) = 4.02$ ,  $p = 0.0051$ ). In contrast, the no-imagery group showed no significant  
101 increase in adaptation (Figure 2A, turquoise; increase of  $5.1 \pm 5.1\%$ ,  $t(15) = 1.21$ ,  $p = 0.24$ ) and did not produce significant  
102 aftereffects (Figure 3C, turquoise; no motor imagery group  $0.17 \pm 0.11$  cm,  $t(7) = 1.83$ ,  $p = 0.11$ ). This suggests that any  
103 reduction in MPE during exposure in the no-imagery group was a consequence of co-contraction or other non-specific  
104 strategies. The absence of adaptation in the no imagery group is consistent with many studies which have shown that static  
105 visual cues are insufficient to reduce interference to opposing force fields (Gandolfo et al., 1996; Howard et al., 2012, 2013,  
106 2015; Sheahan et al., 2016). Our results suggest that just imagining the follow through movement allows the separation of  
107 motor memories.

108 During exposure, adaptation was measured on channel trials with full follow through movements (Figure 1B, left). In the  
109 imagery and no-imagery groups, this reflects the transfer of learning from experience of the force field on movements that  
110 stop at the central target, to full follow through movements. In order to assess the amount of adaptation on the non-follow  
111 through movements themselves (on which the force field was experienced), half of participants in each of the motor imagery  
112 group and no motor imagery group performed an additional phase in which we included channels on non-follow through  
113 trials (Figure 1B, middle and right). The adaptation measured on motor imagery channel trials (motor imagery group) was  
114  $34.0 \pm 6.3\%$  (Figure 2A red, motor imagery channels), and no motor imagery channel trials (no motor imagery group) was  
115  $10.0 \pm 6.0\%$  (Figure 2A, turquoise). There was a significant difference between these groups (Figure 3B;  $24.0 \pm 8.7\%$ ,  $t(14) =$   
116  $2.76$ ,  $p = 0.015$ ). For comparison, we pooled the follow through and planning only groups (pooled follow through group)  
117 based on previous results showing their similar levels of adaptation. We compared the final adaptation in the pooled follow  
118 through group with the adaptation measured on motor imagery channel trials in the imagery group (Figure 3B), and found  
119 no significant difference (difference in adaptation of  $8.9 \pm 7.6\%$ ,  $t(22) = 1.20$ ,  $p = 0.24$ ). This suggests that imagining follow  
120 though movements affords similar levels of adaptation as executing or planning to execute them.

121 In contrast to the motor imagery group, in the full follow through and planning only groups we did not constrain eye  
122 movements. To examine whether potential eye movements to the secondary targets could influence learning, we repeated  
123 the motor imagery task but without constraining eye movements. This no fixation motor imagery group increased their  
124 adaptation (Figure 2A, orange; increase of  $17.2 \pm 3.1\%$ ,  $t(7) = 4.66$ ,  $p = 0.0023$ ) and produced significant aftereffects (Figure 3C,  
125 orange;  $0.75 \pm 0.17$  cm,  $t(7) = 4.98$ ,  $p = 0.0016$ ). We compared the motor imagery groups with and without fixation, and  
126 found no significant effect of fixation on adaptation (difference of  $1.5 \pm 3.6\%$ ,  $t(22) = 0.375$ ,  $p = 0.71$ ). This suggests that  
127 constraining eye movements did not influence learning.

128 We compared the final adaptation levels across groups (Figure 3A). The final adaptation in the no imagery group was  
129 significantly less (difference of  $13.6 \pm 5.4\%$ ,  $t(30) = 2.53$ ,  $p = 0.017$ ) than the motor imagery group, suggesting that imagining  
130 follow through movements has a strong effect on learning. In addition, the pooled follow through group had significantly  
131 greater adaptation than the motor imagery group (difference of  $23.0 \pm 5.0\%$ ,  $t(30) = 4.62$ ,  $p = 6.9e-5$ ) showing that learning  
132 under motor imagery does not transfer fully to actual follow throughs. The aftereffects mirror the results seen in the  
133 measures of adaptation (Figure 3C).

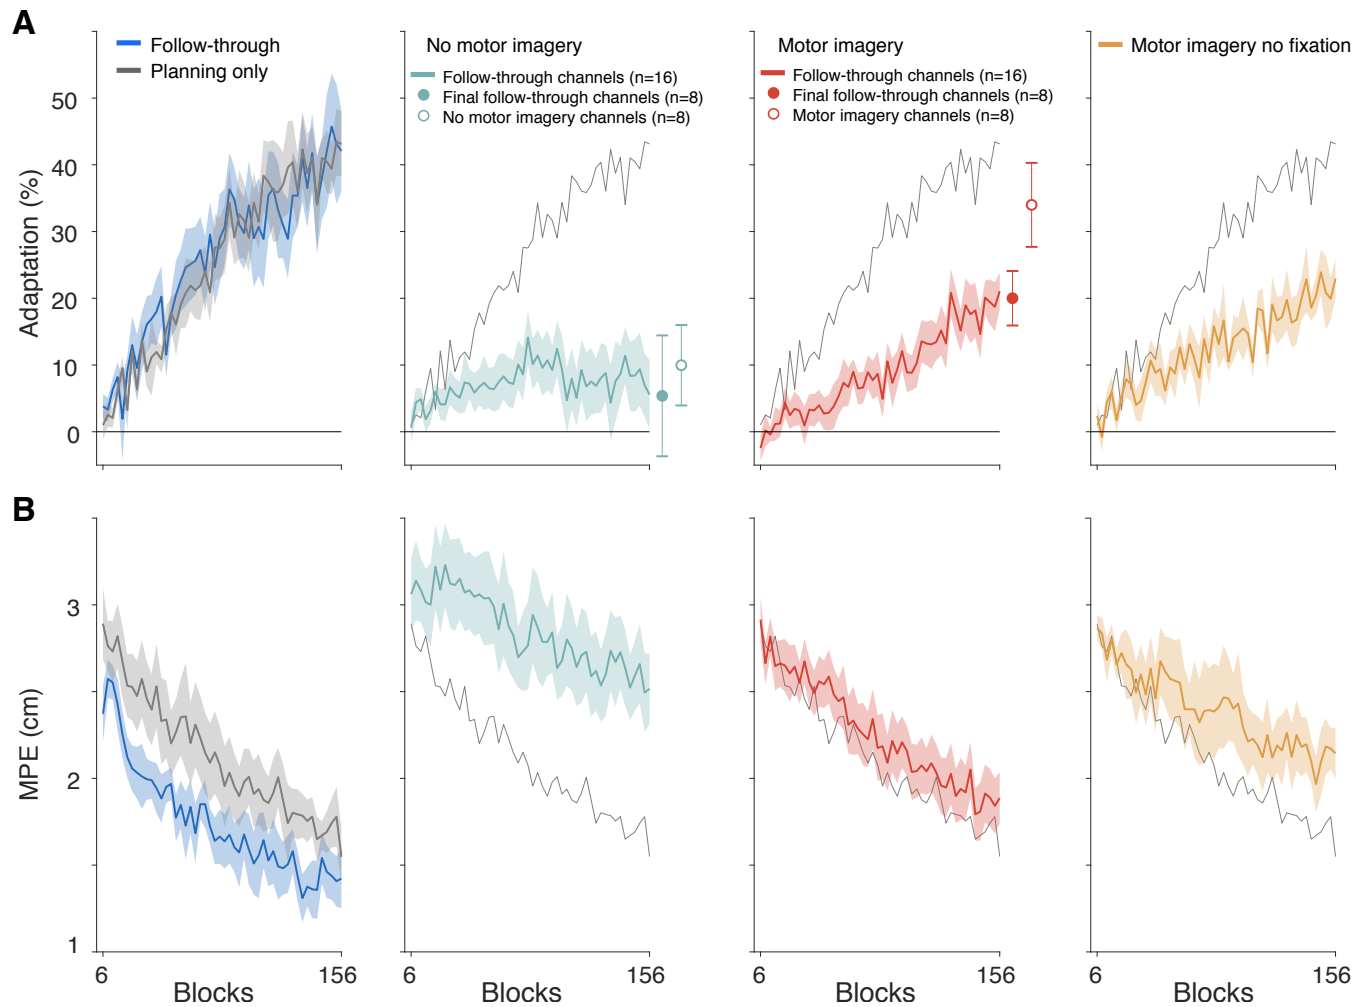

**Figure 2. Motor imagery of follow-through leads to adaptation** (A) Adaptation in the exposure phase, measured on channel trials which were full follow through movements in all groups (Figure 1B, left). The solid circles to the right of the imagery and no-imagery learning curves are the final adaptation on full follow-through channel trials of the participants who subsequently performed the probe phase (half the subjects). The unfilled circles show the adaptation measured on motor imagery- or no-motor imagery channel trials (Figure 1B, middle and right) in the same subjects as the solid circles. (B) Maximum perpendicular error (MPE) measured on exposure trials. Data show mean  $\pm$  s.e. across participants (3 block bins) in the exposure phase. For comparison, the mean adaptation and MPE for the planning only group (grey) are repeated on all panels.

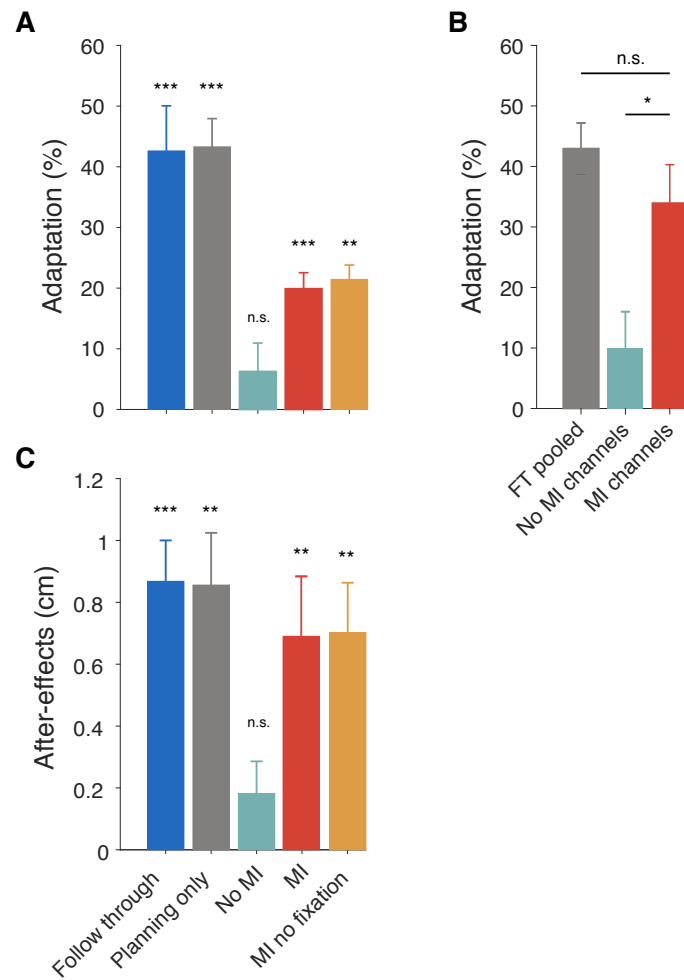

**Figure 3. Adaptation and aftereffects** (A) Final adaptation measured on follow through channel trials for all participants (mean  $\pm$  s.e. of final six blocks of exposure). (B) Comparison of the adaptation between the pooled follow through group and adaptation measured in the subjects who performed the probe phase in the motor imagery and no-imagery groups (first 4 blocks after exposure). (C) MPE during the post-exposure phase (mean  $\pm$  s.e. of first two blocks) showing aftereffects. Here we consider only the no motor imagery and motor imagery participants who did not perform the probe phase. Therefore all participants shown in (C) experienced the same number of exposure trials before after-effects were assessed. Asterisks show statistical significance of final adaptation level (A) and after-effects (C) compared to pre-exposure, and of differences between groups (B). MI = motor imagery; FT = follow through; n.s. = not significant.

134 Comparing the chronometrics of imagined and executed movements (Decety et al., 1989; Sirigu et al., 1996) showed a strong  
 135 correlation (Figure 4;  $r = 0.81$ ,  $p = 1.5e-6$ ; regression slope with zero intercept of 0.97). This suggests that on average subjects  
 136 took a similar amount of time to imagine making follow-through movements as they did to execute them. However, there  
 137 was no correlation between the final level of adaptation in the motor imagery groups and the self-reports from subjects as  
 138 to how often they remembered to imagine follow-through movements ( $r = 0.24$ ,  $p = 0.25$ ), the ease of imagery maintenance  
 139 ( $r = 0.14$ ,  $p = 0.51$ ), or the Motor Imagery Questionnaire (MIQ-RS) scores ( $r = -0.03$ ,  $p = 0.88$ ).

140 During the exposure phase, the frequency of mistrials was not statistically different between the motor imagery group and  
 141 the no motor imagery group for either breaks in fixation (6.0% and 5.3%,  $t(30) = 0.79$ ,  $p = 0.44$ , for each group respectively),  
 142 or central target overshoots (4.0% and 4.1%,  $t(30) = 0.26$ ,  $p = 0.80$ ). This suggests that neither type of mistrial was responsible  
 143 for learning in the motor imagery group. We also compared various kinematic measures during pre-exposure to ensure that  
 144 hand paths on the initial movement did not vary systematically with the secondary targets (see Supplementary Material).

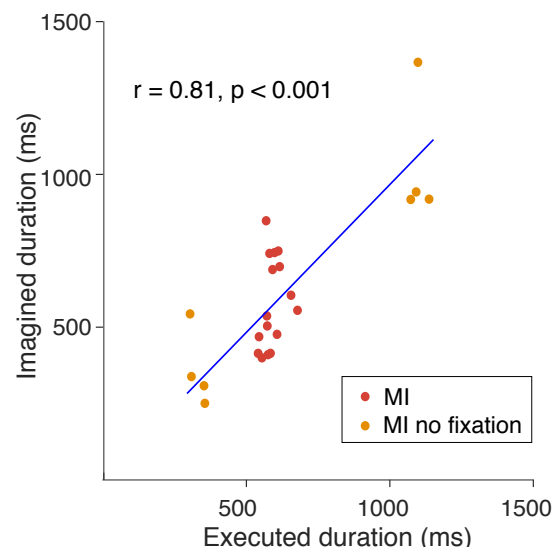

**Figure 4. Chronometrics of real and imagined follow-through movements.** Durations of imagined follow-throughs (indicated by the button press) against duration of executed follow-throughs for the individual subjects in the motor imagery groups.

## Discussion

Our results show that when subjects repeatedly reach in a force field whose direction can reverse from trial to trial, substantial interference occurs and there is no net learning. However, if subjects are asked to imagine making different follow-through movements for each field direction, they show substantial learning for identical movements. Critically, the only difference between these two conditions is motor imagery. This suggests that the act of imagining different future movements, even though subjects know they will not be performed, allows two motor memories to develop for the same physical state of the limb. In contrast to previous studies of mental practice, here imagery is not a mental rehearsal of the skill itself. That is, all subjects actually make the initial movement in the field, but the mental imagery is of a future movement (the follow through) which is separate from the skill itself. This supports a distinct role for mental imagery in the ability to learn novel skills.

Many studies have suggested that practicing a physical skill through motor imagery can result in improvement when subsequently performing the skill (Driskell et al., 1994; Gentili et al., 2010, 2006; Gentili and Papaxanthis, 2015). Traditional theories consider that such motor imagery acts as a simulator (Jeannerod, 2001; Grush, 2004), whereby imagery can improve performance by using a forward model to predict the consequences of non-executed actions (Gentili et al., 2010). That is, a forward model allows a subject to try out different sequences of commands and compare the consequences, or to adapt a controller from the mentally simulated movement with the ensuing imagined error. The value of such a mechanism relies on the notion that, in general, forward models are easier to learn than controllers, as the desired output and the movement outcome can be compared to train a forward model during real action. In contrast the signal that is required to train a controller, that is the error in motor command, is not readily available (Flanagan et al., 2003). Crucially, these studies of motor imagery consider the effects of mentally rehearsing the skill that is to be learned and typically compare learning under actual performance to either no practice or mental practice of the skill. Our study shows that subjects are able to learn two opposing skills, not by imagining the skills themselves, but by pairing each real execution of a perturbed physical movement with subsequent motor imagery that differs for each perturbation. Therefore, our results are unlikely to rely on predicting the consequences of the perturbation with a forward model, but instead suggest that imagining different future movements allows the formation and retrieval of distinct motor memories.

We have previously suggested that the key to representing multiple motor memories is to have each associated with a different neural state, rather than physical state of the body (Sheahan et al., 2016). In this view, the interference seen in the no-imagery control group is due to repeatedly experiencing the same neural states for each reach to the central target. After each trial in an opposing field, the motor system will link these neural states to changes in the motor command, but



174 over time these opposing adjustments cancel out, leading to no learning. Contexts which separate the neural states for the  
175 reach to the central target should allow learning by expanding the representation of the physical state to different neural  
176 states. This would then allow the same physical movement to be associated with different motor commands.

177 One way to create different neural states for the same physical state, is to change the context of each movement by making  
178 the movement to the central target part of a larger motor sequence. For example, the movement in the force field to the  
179 central target could have a different movement before (Howard et al., 2012) or after it (Howard et al., 2015; Sheahan et al.,  
180 2016). In the dynamical systems perspective of motor cortex, planning sets an initial neural state, and execution arises from  
181 the subsequent evolution of the intrinsic neural dynamics (Churchland et al., 2006b, 2012; Shenoy et al., 2013). Therefore,  
182 planning the same kinematic trajectory (movement to the central target) as part of a larger motor sequence will lead to a  
183 different initial neural state and a different subsequent neural trajectory. We have previously shown that planning different  
184 future movements, but aborting the plans before execution, allows learning of different force-fields over the same physical  
185 states. Here our results show that even when subjects know that they will not follow through, motor imagery of a follow  
186 through leads to the ability to learn opposing fields. This suggests that imagining different future movements may lead to  
187 distinct neural states from the start of the movement. Our hypothesis is consistent with recent electrophysiological work in  
188 non-human primates. Recently, Vyas et al. (2018) demonstrated that when monkeys used a brain-machine interface (BMI) to  
189 covertly rehearse cursor reaching movements, they adapted their cursor movements to visuomotor rotations, and moreover  
190 this adaptation transferred reliably but incompletely to overt arm reaching. Furthermore, the initial neural states for each  
191 centre-out BMI-controlled cursor movement closely resembled the initial neural states for the corresponding physical  
192 reaches. This consistency in neural dynamics between BMI-controlled and overt movement preparation is comparable to  
193 the learning and transfer observed here in humans instructed to imagine moving. Considering that similar motor cortical  
194 dynamical features are seen in humans and non-human primates (Pandarinath et al., 2015), this suggests that human  
195 motor imagery may evoke similar preparatory neural states to physical movement. In addition, human neuroimaging  
196 and electrocorticography studies have shown similar motor-related activity when imagining and executing movements  
197 (Dechent et al., 2004; Miller et al., 2010; Mokienco et al., 2013; Héту et al., 2013; Hardwick et al., 2017) and similar effects on  
198 corticospinal excitability (Lebon et al., 2018; Ruffino et al., 2017).

199 Our results demonstrate a complementary function for motor imagery. That is, in addition to its potential use as a simulator  
200 for possible actions, motor imagery can also engage distinct motor memories when preparing for the same physical  
201 movement. We show that mentally imaging a follow through movement can separate motor memories as well as actually  
202 performing or planning a follow through (Figure 3B). Moreover, such learning under mental imagery has significant transfer  
203 to full follow-through movements that are planned and then executed, as indicated by our measures of force adaptation on  
204 full follow-through channel trials. This suggests two features of motor imagery. First, that preparatory neural activity may  
205 be different when preparing to make the same movement when imagining different subsequent movements. Second, the  
206 generalization of this learning to physical action suggests that the neural states evoked when preparing for an imagined  
207 movement are similar to the states for the corresponding planned and executed movement.

208 The link between imagined and executed movement is supported by the similar chronometrics of the two. For example,  
209 imagined movements are known to have similar durations to executed movements (Decety et al., 1989; Sirigu et al., 1996;  
210 Decety, 1996; Papaxanthis et al., 2002) and show a speed-accuracy trade-off (Decety and Jeannerod, 1995; Decety, 1996;  
211 Sirigu et al., 1996; Cerritelli et al., 2000; Bakker et al., 2007). Indeed, all subjects in our study demonstrated chronometric  
212 consistency between their imagined and executed movements. However, the amount of learning seen for each subject was  
213 not correlated with performance on the MIQ-RS motor imagery questionnaire, used for assessing imagery ability (Gregg  
214 et al., 2010). However, a point to point movement is almost the simplest movement one can make and may well be simple  
215 to imagine as reflected in the relatively high mean scores (all above 3.9 out of 7).

216 In summary, we show that simply imagining different future movements can enable the learning and expression of multiple  
217 motor skills executed over the same physical states. Our results suggest a new role for imagining in the representation of  
218 movement: to engage distinct motor memories for different future actions.



## 219 Methods

220 58 subjects (36 female;  $25.0 \pm 4.1$  years, mean  $\pm$  s.d.), with no known neurological disorders, provided informed written  
221 consent and participated in the experiment. All participants were right handed according to the Edinburgh handedness  
222 inventory (Oldfield, 1971) and were naive to the purpose of the experiment. The protocol was approved by the University of  
223 Cambridge Psychology Research Ethics Committee.

224 Experiments were performed using a vBOT planar robotic manipulandum, with associated virtual reality system and air  
225 table (Howard et al., 2009). The vBOT is a custom-built back-drivable planar robotic manipulandum exhibiting low mass  
226 at its handle. The position of the vBOT handle was calculated from optical encoders on the motors (sampled at 1 kHz).  
227 Endpoint forces at the handle of the robotic manipulandum were specified by sending commands to the torque motors.  
228 Participants grasped the handle of the vBOT with their right hand, with their forearm supported by an air sled which  
229 constrained movement to the horizontal plane. Visual feedback was provided using a computer monitor mounted above  
230 the vBOT and projected veridically to the subject via a mirror. This allowed us to display targets and a cursor representing  
231 the hand position (0.5 cm radius disk) overlaid into the plane of the movement.

232 In the fixation groups, eye movements were tracked using an SR Research Eyelink 1000 camera (sampled at 1kHz). The  
233 camera was positioned beneath a cold mirror. At the start of the experiment and after each rest break the eye tracker was  
234 calibrated over the visual work-space.

## 235 Paradigm

236 Participants were divided into five groups. Two subjects were excluded from analysis (see below) and replaced. Data from  
237 two of these groups (the follow-through and planning only groups) has been published previously (n=6 in each group) and is  
238 included here for comparison (Sheahan et al., 2016). For these two groups we added two additional subjects to bring the  
239 number in each group to 8.

240 All participants made reaching movements in a horizontal plane from one of four starting locations to the central target  
241 (grey 1.25 cm radius disk), located approximately 30 cm below the eyes and 30 cm in front of the chest. The four starting  
242 locations were positioned 12 cm from the central target and arranged at  $0^\circ$  (closest to the chest),  $90^\circ$ ,  $180^\circ$  and  $270^\circ$ . In  
243 addition to the start and central target, on each trial one of two secondary targets (yellow 1.25 cm radius disk) was displayed  
244 10 cm from the central target and positioned at either  $+45^\circ$  or  $-45^\circ$  relative to the line connecting the starting and central  
245 target. The groups differed in whether they were required to continue the reach from the central target to the secondary  
246 target and what instructions they were given (see below).

247 During the movement to the central target the robot either generated no force (null field trials), a velocity-dependent  
248 force (exposure trials) or a simulated spring constraining the hand to a straight line path to the target (channel trials). Any  
249 movements from the central to the secondary target were made in a null field. On exposure trials the velocity-dependent  
250 curl force field was implemented as:

$$F = b \begin{bmatrix} 0 & 1 \\ -1 & 0 \end{bmatrix} \begin{bmatrix} \dot{x} \\ \dot{y} \end{bmatrix} \quad (1)$$

251 where  $\dot{x}$  and  $\dot{y}$  are the Cartesian components of the hand velocity and  $b$  is the field constant ( $\pm 15 \text{ N s m}^{-1}$ ) whose sign  
252 determined the direction of the force field, that is clockwise (CW) positive and counter-clockwise (CCW) negative. The  
253 direction of the force-field applied during the movement to the central target was coupled to the position of the secondary  
254 target (e.g. CW for  $+45^\circ$  and CCW for  $-45^\circ$ ). The association between secondary target position and curl field direction was  
255 fixed for each participant and counterbalanced across participants.

256 Channel trials were used to measure subject-generated forces, a measure of feed-forward adaptation (Milner and Franklin,  
257 2005; Scheidt et al., 2000). On a channel trial, the vBOT simulated a spring (spring constant of  $6,000 \text{ N m}^{-1}$  and damping

258 coefficient of  $50 \text{ N s m}^{-1}$  both acting perpendicular to the wall) constraining the subject's movement to a straight line to the  
259 central target.

### 260 Group 1: Follow through (n=8)

261 This experiment has been described previously (Sheahan et al., 2016) and is included here for completeness. At the start of  
262 each trial, one of the starting locations was displayed and the hand was passively moved to it by the vBOT. The central target  
263 and one of the two possible secondary targets were then displayed (Figure 1A, Follow through). Subjects were required to  
264 remain within the start location for 300 ms, after which they were cued by a tone to start the movement and to move to the  
265 central target and then secondary target. Subjects had to remain within the central target for at least 50 ms before following  
266 through to the secondary target. Subjects were encouraged to make the entire movement between 400 and 800 ms. They  
267 received text feedback "correct speed", "too slow" or "too fast" as appropriate. If subjects moved before the tone, took  
268 longer than 1.5 s to complete the movement, or took longer than 1 s to initiate movement after the tone, a mistrial was  
269 triggered and subjects were required to repeat the trial. At the end of each trial the vBOT passively moved the hand to the  
270 next starting location using a sinusoidal velocity profile.

271 A block consisted of 8 exposure trials and 2 channel trials, such that an exposure trial was experienced at each combination  
272 of the four starting positions and two possible secondary target positions (corresponding to the two different field directions).  
273 All channel trials were performed from the  $0^\circ$  starting position, one for each of the secondary target positions. The order of  
274 trials within a block was pseudorandom.

275 Before the experiment subjects were given 30 trials of familiarization in a null field. They then performed a pre-exposure  
276 phase of 5 blocks (40 null trials), an exposure phase of 150 blocks (1200 exposure trials), and finally a post-exposure phase  
277 of 3 blocks (24 null trials). Rest breaks (1.5 min) were provided approximately every 200 trials, with a longer rest break  
278 available in the middle of the experiment if required.

### 279 Group 2: Planning only (n=8)

280 The experiment has been described previously (Sheahan et al., 2016). In the planning only group we isolated the effect of  
281 planning a follow-through without executing it. In contrast to the follow-through group, once the hand had moved 6 cm  
282 towards the central target, the secondary target was extinguished on all null and exposure trials (Figure 1A, Planning only).  
283 Participants were instructed that if the secondary target disappeared, they were not to execute the secondary movement  
284 but instead stop at the central target. We chose 6 cm so as to trade-off the length that we displayed the secondary target  
285 during the movement to the central target (as planning could take place during this movement) and the ability of participants  
286 to terminate the movement and not overshoot the central target by 3 cm, which would trigger a mistrial.

287 Critically, on all channel trials the secondary target did not disappear and subjects performed the full follow through. In  
288 order to encourage participants to plan the follow-through movement we included channel trials for all starting positions.  
289 Therefore, in this group we kept the total number of exposure trials the same as the follow-through group (1200 exposure  
290 trials), but doubled the number of channel trials, including them for each reach direction equally. Therefore a block was  
291 12 trials including 4 channel trials. Across pairs of blocks we included two exposure trials and one channel trial for every  
292 combination of starting location and secondary target position, therefore we increased the pre-exposure phase to 6 blocks  
293 and the post-exposure phase to 4 blocks. Text feedback on movement duration was provided only on full follow through  
294 channel trials in order to match overall kinematics to the follow through group.

### 295 Group 3: Motor imagery (n=16)

296 In this group we examined the effect of imagining performing a follow through movement, with the knowledge that it  
297 would not be executed. In contrast to the planning only group, the central target colour (blue or grey) indicated whether  
298 participants had to execute a reaching movement and stop at the central target, or reach to the central and then the  
299 secondary target. When the central target was blue, they executed a movement only to the central target, but were asked to

300 imagine making the follow through movement (Figure 1A, Motor imagery). When the central target was grey, participants  
301 planned and execute a full follow through movement. As in the planning only group, on follow through trials the movement  
302 to the central target was in a channel. On motor imagery trials participants were asked to press a button with their other  
303 hand to indicate when their imagined movement reached the secondary target. A single button was used for all secondary  
304 targets, so that the motor plan for this button press was not specific to the follow through direction. This enabled us to  
305 compare the duration of imagined and executed movements.

306 This group were required to fixate on a small white cross located on the central target during each trial. This was to ensure  
307 that participants did not make eye movements to the secondary targets. Participants rested their forehead against a  
308 headrest and were required to fixate on the cross and maintain fixation within 3 cm for the duration of the trial. If subjects  
309 broke fixation or blinked, an error was triggered and the trial was repeated. Participants could move their eyes freely  
310 between trials.

311 Blocks were the same as for the planning only group. At the end of the exposure phase, half of participants performed the  
312 post-exposure phase, as in the planning only group so that we could compare aftereffects. The other half of participants  
313 performed an additional 20 blocks (termed the probe phase) in which we assessed adaptation on motor imagery trials  
314 without follow through. In these probe blocks we kept the proportion of trials that were exposure trials the same as in  
315 previous blocks, but changed half of the full follow through channel trials to motor imagery channel trials (Figure 1B, middle).  
316 Therefore, these 20 blocks consisted of 160 exposure trials, 40 motor imagery channel trials and 40 full follow through  
317 channel trials. After the probe phase these participants performed the same post-exposure phase as the other participants.

318 During each rest break, participants were asked to evaluate their motor imagery in the previous set of trials (approximately  
319 240 trials). They rated the ease with which they were able to imagine the movements (1-7, hard to easy scale, similar in style  
320 to the MIQ-RS (Gregg et al., 2010)), and how frequently they imagined the movements (1-3 scale corresponding to 'fewer  
321 than half the trials', 'most trials' or 'every trial').

322 All participants also completed the MIQ-RS motor imagery questionnaire (Gregg et al., 2010) prior to the start of the  
323 experiment. This questionnaire has previously been evaluated for reliability and internal consistency of visual and kinesthetic  
324 measures of motor imagery (Butler et al., 2012).

#### 325 Group 4: No motor imagery (n=16)

326 This group was the same as the motor imagery group except that participants were not instructed to imagine making  
327 follow-through movements and did not press a button (Figure 1A, No motor imagery). To match the time spent at the central  
328 target with the motor imagery group, participants waited at the central target for the mean time it took them to execute  
329 the follow through movements on channel trials (the average of previous follow through trials). As in the motor imagery  
330 group, at the end of exposure phase half of participants performed the post-exposure phase to compare aftereffects. The  
331 other half of participants performed the same probe phase as in the motor imagery group, but without the use of motor  
332 imagery. Therefore participants performed no motor imagery channel trials (Figure 1B, right). After the probe phase these  
333 participants performed the same post-exposure phase as the other participants.

334 At the end of the experiment participants were asked if they had been imagining follow-through movements on trials where  
335 they had to stop at the central target. One participant responded that they had been, and was excluded from analysis and  
336 replaced by an additional subject.

337 One further participant was excluded from this group and replaced by an additional subject. Midway through the experiment,  
338 this replaced subject suddenly started producing a kinematic error in the direction opposite to the field and their adaptation  
339 measured on no motor imagery channel trials was greater than 6 standard deviations from the group mean.

340 Group 5: Motor imagery no fixation (n=8)

341 This group performed the same experiment as the motor imagery group but without constraints on their eye movements.  
342 This was to make the use of eye movements in this group comparable to the follow through and planning only groups. At  
343 the end of the exposure phase all participants immediately performed the post-exposure phase.

## 344 Analysis

345 On channel trials we measured percent adaptation as the slope of the regression of the time course of the force that  
346 participants produced into the channel wall against the ideal force profile that would fully compensate for the field. To do  
347 this we extracted a 400 ms (or the maximum available) window of data centred on the time of peak velocity and calculated  
348 the force generated against the channel. We used the velocity along the channel to predict the force the vBOT would have  
349 applied on an exposure trial. We performed regression (with zero intercept) on these time series and expressed the slope  
350 as a percentage (slope of 1 = 100%), termed adaptation. We analyzed all channel trials for the follow through group, which  
351 were all performed from the 0° starting location. The other groups had channel trials for all starting locations and to match  
352 the number of channel trials analyzed we included all channels in the sagittal direction (0 and 180° starting locations). The  
353 inclusion of only 0° channel trials does not affect the statistical conclusions.

354 In addition, on null and exposure trials, we calculated the maximum perpendicular error (MPE) as the largest deviation of  
355 the hand from the straight line connecting the starting location to the central target. The sign of MPE on each trial was set  
356 such that a positive MPE indicated a kinematic error in the same direction as the force field (as would be expected in early  
357 learning).

358 For statistical analysis, our key measures were adaptation during exposure (as MPE can be affected by co-contraction)  
359 and MPE during post-exposure. We averaged adaptation and MPE for each subject within a block. To assess learning we  
360 used two measures. The first measure was the difference in adaptation between the average of the pre-exposure blocks  
361 and that of the final 6 blocks of exposure. The second measure assessed the aftereffects, calculated as the difference in  
362 MPE between the average of the pre-exposure blocks with the first two blocks of post-exposure. For both measures we  
363 performed a paired t-test across subjects for each group.

364 To compare learning between groups, we performed 3 planned comparisons of final adaptation on follow through trials  
365 (average of last 6 blocks of exposure) using unpaired t-tests. Based on previous work we combined the follow through and  
366 planning only groups into a pooled follow through group. We compared the motor imagery group to the pooled follow  
367 through and no imagery groups. We also compared the motor imagery group to the motor imagery (no fixation) group. As  
368 these tests compare the learning that transferred to full follow-through trials, we performed an additional two comparisons  
369 to test learning independent of transfer. We compared the learning on motor imagery channels in the motor imagery group  
370 subjects who performed the probe phase (n=8, average of first 4 blocks of the probe phase), to the learning on no motor  
371 imagery channels in the no motor imagery group subjects who performed the probe phase (n=8, also the average of first 4  
372 blocks of the probe phase), and to the final adaptation of the pooled follow through group.

373 We made several between-group comparisons using unpaired t-tests to compare different features of behaviour that could  
374 have affected learning. We performed between-group comparisons of the percentage of imagery mistrials due to breaks in  
375 fixation (excluding blinks or breaks made before the cue to move), hand overshoots of the central target, and of the time  
376 spent at the central target.

377 We report uncorrected p values.

## 378 Assessments of motor imagery

379 For the groups who were asked to imagine the follow through movement, the duration of the imagined movement was  
380 taken as the time from reaching the central target until the button press. We used this to assess mental chronometry in  
381 each subject (Decety et al., 1989; Sirigu et al., 1996), which compares the average imagined movement duration to the

382 average executed movement duration on the channel trials.

383 We regressed the percent adaptation of each subject in the final 6 blocks of the exposure phase against three different  
384 self-reported motor imagery measures: MIQ score (1-7), average ease of imagery maintenance score (1-7) and average  
385 frequency of imagery score (1-3).

### 386 Data availability

387 Data that support the findings of this study are available from the corresponding author on request.

### 388 Code availability

389 The MATLAB analysis scripts used to generate figures and analyze data in this study are available from the corresponding  
390 author on request.

## 391 Acknowledgments

392 We thank the Wellcome Trust, Royal Society (Noreen Murray Professorship in Neurobiology to D.M.W.), the Cambridge  
393 Commonwealth, European and International Trusts and the Rutherford Foundation Trust (H.R.S).

## 394 Author contributions

395 H.R.S., J.N.I. and D.M.W. designed the study. H.R.S. and G.M.Z. performed the experiments. H.R.S. performed the analyses,  
396 and drafted the manuscript. H.R.S, J.N.I and D.M.W. edited the manuscript.

## 397 References

- 398 Bakker, M., De Lange, F. P., Stevens, J. A., Toni, I., and Bloem, B. R. (2007). Motor imagery of gait: A quantitative approach. *Experimental Brain*  
399 *Research*, 179(3):497–504.
- 400 Brashers-Krug, T., Shadmehr, R., and Bizzi, E. (1996). Consolidation in human motor memory. *Nature*, 382(6588):252–255.
- 401 Butler, A. J., Cazeaux, J., Fidler, A., Jansen, J., Lefkove, N., Gregg, M., Hall, C., Easley, K. A., Shenvi, N., and Wolf, S. L. (2012). The movement  
402 imagery questionnaire-revised, second edition (MIQ-RS) is a reliable and valid tool for evaluating motor imagery in stroke populations.  
403 *Evidence-based Complementary and Alternative Medicine*, 2012.
- 404 Cerritelli, B., Maruff, P., Wilson, P., and Currie, J. (2000). The effect of an external load on the force and timing components of mentally  
405 represented actions. *Behavioural Brain Research*, 108(1):91–96.
- 406 Churchland, M. M., Cunningham, J. P., Kaufman, M. T., Foster, J. D., Nuyujukian, P., Ryu, S. I., and Shenoy, K. V. (2012). Neural population  
407 dynamics during reaching. *Nature*, 487(7405):51–56.
- 408 Churchland, M. M., Santhanam, G., and Shenoy, K. V. (2006a). Preparatory activity in premotor and motor cortex reflects the speed of the  
409 upcoming reach. *Journal of Neurophysiology*, 96(6):3130–3146.
- 410 Churchland, M. M., Yu, B., Ryu, S. I., Santhanam, G., and Shenoy, K. V. (2006b). Neural Variability in Premotor Cortex Provides a Signature of  
411 Motor Preparation. *Journal of Neuroscience*, 26(14):3697–3712.
- 412 Decety, J. (1996). Do imagined and executed actions share the same neural substrate? *Cognitive Brain Research*, 3(2):87–93.
- 413 Decety, J. and Jeannerod, M. (1995). Mentally simulated movements in virtual reality: does Fitt's law hold in motor imagery? *Behavioural*  
414 *Brain Research*, 72(1-2):127–134.
- 415 Decety, J., Jeannerod, M., and Prablanc, C. (1989). The timing of mentally represented actions. *Behavioural Brain Research*, 34(1-2):35–42.
- 416 Dechent, P., Merboldt, K.-D., and Frahm, J. (2004). Is the human primary motor cortex involved in motor imagery? *Cognitive Brain Research*,  
417 19(2):138–144.

- 418 Driskell, J. E., Copper, C., and Moran, A. (1994). Does mental practice enhance performance? *Journal of Applied Psychology*, 79(4):481–492.
- 419 Flanagan, J. R., Vetter, P., Johansson, R. S., and Wolpert, D. M. (2003). Prediction precedes control in motor learning. *Current Biology*,  
420 13(2):146–150.
- 421 Fu, Q. J., Suarez, J. I., and Ebner, T. J. (1993). Neuronal specification of direction and distance during reaching movements in the superior  
422 precentral premotor area and primary motor cortex of monkeys. *Neurosurgery*, 70(5):2097 – 2166.
- 423 Gandolfo, F., Mussa-Ivaldi, F. A., and Bizzi, E. (1996). Motor learning by field approximation. *Proceedings of the National Academy of Sciences*,  
424 93(April):3843–3846.
- 425 Gentili, R., Han, C. E., Schweighofer, N., and Papaxanthis, C. (2010). Motor Learning Without Doing: Trial-by-Trial Improvement in Motor  
426 Performance During Mental Training. *Journal of Neurophysiology*, 104(2):774–783.
- 427 Gentili, R., Papaxanthis, C., and Pozzo, T. (2006). Improvement and generalization of arm motor performance through motor imagery  
428 practice. *Neuroscience*, 137(3):761–772.
- 429 Gentili, R. J. and Papaxanthis, C. (2015). Laterality effects in motor learning by mental practice in right-handers. *Neuroscience*, 297:231–242.
- 430 Gregg, M., Hall, C., and Butler, A. (2010). The MIQ-RS: A suitable option for examining movement imagery ability. *Evidence-based  
431 Complementary and Alternative Medicine*, 7(2):249–257.
- 432 Grush, R. (2004). The emulation theory of representation: Motor control, imagery, and perception. *Behavioral and Brain Sciences*,  
433 27(3):377–396.
- 434 Hardwick, R. M., Caspers, S., Eickhoff, S. B., and Swinnen, S. P. (2017). Neural Correlates of Motor Imagery, Action Observation, and  
435 Movement Execution: A Comparison Across Quantitative Meta-Analyses. *bioRxiv*.
- 436 Héту, S., Grégoire, M., Saimpont, A., Coll, M. P., Eugène, F., Michon, P. E., and Jackson, P. L. (2013). The neural network of motor imagery: An  
437 ALE meta-analysis. *Neuroscience and Biobehavioral Reviews*, 37(5):930–949.
- 438 Hocherman, S. and Wise, S. P. (1991). Effects of hand movement path on motor cortical activity. *Experimental Brain Research*, 83:285–302.
- 439 Howard, I. S., Ingram, J. N., Franklin, D. W., and Wolpert, D. M. (2012). Gone in 0.6 Seconds: The Encoding of Motor Memories Depends on  
440 Recent Sensorimotor States. *Journal of Neuroscience*, 32(37):12756–12768.
- 441 Howard, I. S., Ingram, J. N., and Wolpert, D. M. (2009). A modular planar robotic manipulandum with end-point torque control. *Journal of  
442 Neuroscience Methods*, 181(2):199–211.
- 443 Howard, I. S., Wolpert, D. M., and Franklin, D. W. (2013). The effect of contextual cues on the encoding of motor memories. *Journal of  
444 Neurophysiology*, 109(10):2632–2644.
- 445 Howard, I. S., Wolpert, D. M., and Franklin, D. W. (2015). The value of the follow-through derives from motor learning depending on future  
446 actions. *Current Biology*, 25(3):397–401.
- 447 Hwang, E. J., Donchin, O., Smith, M. A., and Shadmehr, R. (2003). A gain-field encoding of limb position and velocity in the internal model of  
448 arm dynamics. *PLoS Biology*, 1(2).
- 449 Jeannerod, M. (2001). Neural simulation of action: A unifying mechanism for motor cognition. *NeuroImage*, 14:103–109.
- 450 Lebon, F., Ruffino, C., Greenhouse, I., Labruna, L., Ivry, R. B., and Papaxanthis, C. (2018). The Neural Specificity of Movement Preparation  
451 During Actual and Imagined Movements. *Cerebral Cortex*, (January):1–12.
- 452 Messier, J. and Kalaska, J. F. (2000). Covariation of primate dorsal premotor cell activity with direction and amplitude during a memorized-  
453 delay reaching task. *Journal of Neurophysiology*, 84(1):152–165.
- 454 Miller, K., Schalk, G., Fetz, E., den Nijs, M., Ojemann, J., and Rao, R. (2010). Cortical activity during motor execution, motor imagery, and  
455 imagery-based online feedback. *Proceedings of the National Academy of Sciences*, 107(15):7113–7113.
- 456 Milner, T. E. and Franklin, D. W. (2005). Impedance control and internal model use during the initial stage of adaptation to novel dynamics  
457 in humans. *The Journal of Physiology*, 567(Pt 2):651–664.
- 458 Mokienko, O. A., Chervyakov, A. V., Kulikova, S. N., Bobrov, P. D., Chernikova, L. A., Frolov, A. A., and Piradov, M. A. (2013). Increased motor  
459 cortex excitability during motor imagery in brain-computer interface trained subjects. *Frontiers in computational neuroscience*, 7.
- 460 Oldfield, R. (1971). The assessment and analysis of handedness: the Edinburgh inventory. *Neuropsychologia*, 9(1):97–113.
- 461 Pandarinath, C., Gilja, V., Blabe, C. H., Nuyujukian, P., Sarma, A. A., Soric, B. L., Eskandar, E. N., Hochberg, L. R., Henderson, J. M., and Shenoy,  
462 K. V. (2015). Neural population dynamics in human motor cortex during movements in people with ALS. *eLife*, 4:e07436.



- 463 Papaxanthis, C., Schieppati, M., Gentili, R., and Pozzo, T. (2002). Imagined and actual arm movements have similar durations when  
464 performed under different conditions of direction and mass. *Experimental Brain Research*, 143(4):447–452.
- 465 Riehle, A. and Requin, J. (1989). Monkey primary motor and premotor cortex: single-cell activity related to prior information about direction  
466 and extent of an intended movement. *Journal of Neurophysiology*, 61(3):534–49.
- 467 Ruffino, C., Papaxanthis, C., and Lebon, F. (2017). Neural plasticity during motor learning with motor imagery practice: Review and  
468 perspectives. *Neuroscience*, 341:61–78.
- 469 Scheidt, R. a., Reinkensmeyer, D. J., Conditt, M. a., Rymer, W. Z., and Mussa-Ivaldi, F. A. (2000). Persistence of motor adaptation during  
470 constrained, multi-joint, arm movements. *Journal of Neurophysiology*, 84(2):853–862.
- 471 Sheahan, H. R., Franklin, D. W., and Wolpert, D. M. (2016). Motor Planning, Not Execution, Separates Motor Memories. *Neuron*, 92(4):773–779.
- 472 Shenoy, K. V., Sahani, M., and Churchland, M. M. (2013). Cortical control of arm movements: a dynamical systems perspective. *Annual  
473 review of neuroscience*, 36:337–59.
- 474 Sirigu, A., Duhamel, J.-R., Cohen, L., Pillon, B., Dubois, B., and Agid, Y. (1996). The Mental Representation of Hand Movements After Parietal  
475 Cortex Damage. *Science*, 273(5281):1564–1568.
- 476 Vyas, S., Even-Chen, N., Stavisky, S. D., Ryu, S. I., Nuyujukian, P., and Shenoy, K. V. (2018). Neural Population Dynamics Underlying Motor  
477 Learning Transfer. *Neuron*, 97(5):1177–1186.

## 478 Supplementary Material

479 To encourage uniformity of movement kinematics, we placed constraints on the timing of participants' reaches (see  
 480 Methods). If unperturbed movements to the central target were substantially different for the two possible secondary  
 481 targets, this could have facilitated learning (Howard et al., 2013; Hwang et al., 2003). Therefore, we examined whether the  
 482 kinematics of pre-exposure movements to the central target within each group depended on which secondary target ( $\pm 45^\circ$ )  
 483 was displayed.

484 We extracted position data from when the hand left the starting location until 50 ms after it entered the central target. We  
 485 tested for baseline differences in peak speed, movement duration (which covaries with peak speed), maximum signed lateral  
 486 deviation and path length. Preparatory neural activity has been shown to differ as a function of peak speed (Churchland  
 487 et al., 2006a), hand path curvature (Hoehnerman and Wise, 1991), and movement extent (Fu et al., 1993; Messier and Kalaska,  
 488 2000; Riehle and Requin, 1989), and such differential activity during planning might affect learning.

489 For each group and kinematic measure we performed a repeated-measures ANOVA on the pre-exposure null trials as  
 490 a function of follow-through direction ( $\pm 45^\circ$ ). Of the 20 tests (Table 1), we found one marginally significant difference  
 491 (motor imagery path length,  $p=0.046$ ), however the mean difference in path length between left and right secondary target  
 492 positions was only 0.13cm, which other studies have shown is insufficient to drive learning (Hwang et al., 2003).

**Table 1. Movement kinematics on pre-exposure (null field) trials do not depend on secondary target position.** Data are for the movement to the central target, and from a single start position ( $0^\circ$ ).  $\delta$  is the difference between mean measures for each target ( $+45^\circ$  target minus  $-45^\circ$  target).

| Measure                | Follow-through |           |       | Planning only |           |       | No motor imagery |            |       | Motor imagery |            |       | Motor imagery no fixation |           |       |
|------------------------|----------------|-----------|-------|---------------|-----------|-------|------------------|------------|-------|---------------|------------|-------|---------------------------|-----------|-------|
|                        | $\delta$       | $F_{1,7}$ | p     | $\delta$      | $F_{1,7}$ | p     | $\delta$         | $F_{1,15}$ | p     | $\delta$      | $F_{1,15}$ | p     | $\delta$                  | $F_{1,7}$ | p     |
| Lateral deviation (cm) | -0.26          | 0.49      | 0.507 | -0.37         | 0.85      | 0.387 | -0.12            | 0.93       | 0.350 | -0.27         | 2.96       | 0.106 | -0.52                     | 3.54      | 0.102 |
| Path length (cm)       | -0.01          | 0.00      | 0.953 | -0.45         | 4.76      | 0.065 | -0.01            | 0.02       | 0.901 | -0.13         | 4.72       | 0.046 | 0.11                      | 0.96      | 0.361 |
| Duration (s)           | -0.01          | 0.06      | 0.807 | -0.03         | 0.56      | 0.478 | -0.00            | 0.55       | 0.472 | -0.01         | 1.06       | 0.319 | 0.01                      | 0.14      | 0.724 |
| Peak Speed (cm/s)      | -0.8           | 0.69      | 0.434 | -0.6          | 0.15      | 0.711 | -1.0             | 2.16       | 0.163 | -0.8          | 2.12       | 0.166 | 0.1                       | 0.02      | 0.890 |
